# Supplementary material
Source: Research Square preprint supplement (doi:10.21203/rs.3.rs-8818719/v1)
Supplement: Supplementary file 1 [file 2d0bc28e13810c6350e315a3.docx]

**Table 3. BRCA mutations detected in** **cytological samples and blood of 58 patients with ovarian cancer**

| Sample *No.* | Gene | Mutation | Mutation detected in cytological samples | Mutation detected in blood | Germline/Somatic mutation |
| --- | --- | --- | --- | --- | --- |
| 1  2  3  4  5  6  7  8  9 | BRCA1  BRCA1  BRCA1  BRCA1  BRCA1  BRCA1  BRCA2  BRCA2  BRCA2 | exon11 c.938T>A p. (L313*)  exon11 c.2722G>T p.(E908*)  exon16 del  intron2 c.81-2A>G  exon11 c.1504_1508del p.(L502Afs*2)  exon11 c.975_976delinsAT p.(E326*)  exon11 c.6490C>Tp.(Q2164*)  exon23 c.9070_9073del p.(N3024Yfs*3)  exon22 c.8839_8851del p.(E2947Pfs*25) | YES  YES  YES  YES  YES  YES  YES  YES  YES | YES  YES  YES  YES  YES  NO  YES  YES  NO | Germline  Germline  Germline  Germline  Germline  Somatic  Germline  Germline  Somatic |
