# Supplementary material
Source: Research Square preprint supplement (doi:10.21203/rs.3.rs-8818719/v1)
Supplement: Supplementary file 2 [file 3e7e8f85bd206545611c2911.docx]

**Table 2. Immunohistochemistry results of 58 patients with ovarian cancer**

|  | HGSC (n = 45) | LGSC (n = 10) | EC (n = 3) |
| --- | --- | --- | --- |
| PAX-8, *n* (%)  WT-1, *n* (%)  CA-125, *n* (%)  CK7, *n* (%)  CK20, *n* (%) | 21 (87.5)  36 (87.8)  40 (100)  43 (97.7)  3 (6.67) | 7 (100)  9 (90)  9 (90)  10 (100)  0 (0) | 3 (100)  2 (66.7)  2 (66.7)  3 (100)  0 (0) |
