# Supplementary material
Source: Research Square preprint supplement (doi:10.21203/rs.3.rs-8818719/v1)
Supplement: Supplementary file 3 [file f77a299b93ae65e988b6c773.docx]

**Table 1.** **Clinical characteristics of 58 patients with ovarian cancer**

|  | **HGSC** **(n = 45)** | **LGSC** **(n = 10)** | **EC** **(n = 3)** |
| --- | --- | --- | --- |
| **Age at diagnosis (*n%*)**  Median  Range  **FIGO stage (*n%*)**  Ⅱb  Ⅲb  Ⅲc  Ⅳ  **Family history**  Positive  Negative  **CA-125 (U/mL)**  Median  Range  **Ascites (mL)**  Median  Range  **Follow-up time (month)**  Mean  Range | 62 (77.6)  36-90  0 (0)  1 (2.2)  23 (51.1)  21 (46.7)  1  44  1194  242-6220  1000  100-4000  14.3±11.36  2-52 | 62.6 (17.2)  52-82  1 (10)  0 (0)  9 (90)  0 (0)  0  10  1541.5  437-4900  925  300-1300  26.2±8.96  12-47 | 64 (5.2)  43-65  0 (0)  0 (0)  1 (33.3)  2 (66.7)  0  3  233  66-9405    240  200-1000  18.33±7.76  6-27 |
